# Supplementary material for: Impact of Plasmonic Nanoparticles on Poikilocytosis and Microrheological Properties of Erythrocytes
Source: MDPI journal article supplement (doi:10.3390/pharmaceutics15041046), 2023-03-23
Supplement: s1 [file s1]

## Supporting Information

### **Impact of plasmonic nanoparticles on hemorheology of erythrocytes**

*Tatiana Avsievich\*, Ruixue Zhu, Alexey P. Popov, Alexander Yatskovskiy, Anton A. Popov, Gleb Tikhonowsky, Andrei Pastukhov, Sergei Klimentov, Alexander Bykov, Andrei Kabashin and Igor Meglinski\**

**Table S1.** Zeta potential values (mean  $\pm$  SD, N = 3) measured in deionized water (DI) and Dulbecco's Phosphate Buffered Saline (DPBS).

| Sample | Zeta Potential (mV) |                 |
|--------|---------------------|-----------------|
|        | DI                  | DPBS            |
| Ag NP  | -31.6 $\pm$ 3.3     | -28.4 $\pm$ 1.6 |
| Au NP  | -33 $\pm$ 3.4       | -21 $\pm$ 1.31  |
| TiN NP | -38.7 $\pm$ 2.8     | -20 $\pm$ 1.2   |
| ZrN NP | -39.2 $\pm$ 0.9     | -17.6 $\pm$ 1.2 |

The parameters to characterize RBC aggregation in syllectometry are usually retrieved from the exponential representation of kinetics curves. The kinetics of aggregation process in static conditions was retrieved from the optical microscopy images by calculating the change of area occupied by RBCs:

$$S_{RBCs}(t) = a \cdot \exp\left(-\frac{x}{t_1}\right) + c,$$

within 2 h (see Fig. 3 (a)). Aggregation kinetics is characterized by a time constant  $t_1$  and by a half time  $T_{1/2}$ , which is the time interval where the area occupied by RBC is reduced by half the amplitude  $a$ .

**Table S2.** Temporal aggregation parameters derived from the kinetics curves of the area occupied by RBC change in time.

| Sample  | $t_1$ , min       | $T_{1/2}$ , min |
|---------|-------------------|-----------------|
| Control | 23.8 $\pm$ 1.1    | 16.5 $\pm$ 0.8  |
| Ag NP   | 29.4 $\pm$ 1.4    | 20.4 $\pm$ 0.9  |
| Au NP   | 28.3 $\pm$ 1      | 19.6 $\pm$ 0.7  |
| TiN NP  | 119.34 $\pm$ 16.9 | 82.7 $\pm$ 11.7 |
| ZrN NP  | 13.2 $\pm$ 1.3    | 9.2 $\pm$ 0.9   |

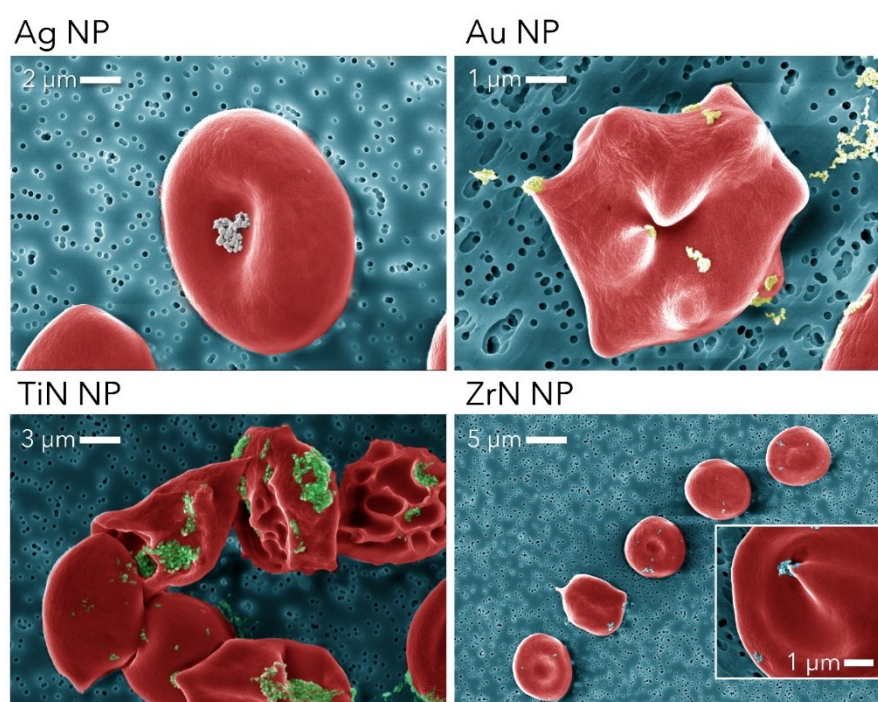

**Figure S1.** Colored SEM images of RBC treated with (a) Ag NP, (b) Au NP, (c) TiN NP, (d) ZrN NP at concentration  $100 \mu\text{g mL}^{-1}$ .
